# Supplementary material
Source: publisher site journal article supplement (http://www.kjim.org/upload/media/kjim-2019-006-suppl4.pdf)
Supplement: Supplementary file 1 [file kjim-2019-006-suppl4.pdf]

**Supplementary Table 4. Association of body composition with the health assessment questionnaire**

| Covariate and tertiles/groups  | Unadjusted analyses |         | Adjusted analyses |         |
|--------------------------------|---------------------|---------|-------------------|---------|
|                                | OR (95% CI)         | p value | OR (95% CI)       | p value |
| Sex                            | 1.31 (0.58–2.97)    | 0.510   | NA                |         |
| Age                            | 1.04 (1.02–1.07)    | < 0.001 | 1.05 (1.02–1.07)  | < 0.001 |
| Disease duration, yr           | 1.03 (0.99–1.07)    | 0.140   | NA                |         |
| Anti-CCP positivity            | 0.87 (0.5–1.53)     | 0.640   | NA                |         |
| Current steroid dose           | 1.02 (0.93–1.13)    | 0.640   | NA                |         |
| DAS28                          | 2.01 (1.55–2.61)    | < 0.001 | 2.07 (1.59–2.71)  | < 0.001 |
| BMI                            | 1.07 (0.99–1.14)    | 0.070   | NA                |         |
| Skeletal muscle mass           | 0.94 (0.88–1.01)    | 0.110   | NA                |         |
| Body fat mass                  | 1.04 (1–1.08)       | 0.040   | 1.02 (0.98–1.07)  | 0.250   |
| Body fat/skeletal muscle ratio | 0.92 (0.52–1.64)    | 0.790   | NA                |         |

OR, odds ratio; CI, confidence interval; NA, not applicable; CCP, citrullinated protein antibody; DAS28, disease activity score in 28 joints; BMI, body mass index.
